# Supplementary material
Source: PubMed Central journal article supplement (PMC558535)
Supplement: bmj_38483.478183.EB_1.pdf [file bmj_38483.478183.EB_1.pdf]

[Table A](#)

[Table B](#)

**Posted as supplied by author.**

**Table A** Validity criteria for papers reporting on the accuracy of C reactive protein in the detection of radiologically proved pneumonia (first research question of the study), or differentiation of bacterial from viral aetiology of lower respiratory tract infection (second research question)

| <b>Criteria for study validity</b>                               | <b>Positive score</b>                                                                                                                                                                                                           |
|------------------------------------------------------------------|---------------------------------------------------------------------------------------------------------------------------------------------------------------------------------------------------------------------------------|
| Blind measurement of index test and reference test*              | In both directions (+), only index or reference test (-), not measured independently (-) or not mentioned (?)                                                                                                                   |
| Avoidance of verification bias*                                  | Assessment by reference standard independent from index test results (+), partly dependent (-) or not mentioned (?)                                                                                                             |
| Spectrum of the disease*                                         | Prospective clinical population (+) or case-control (-)                                                                                                                                                                         |
| Avoidance of selection bias                                      | Consecutive (+), non-consecutive (-) or not mentioned (?)                                                                                                                                                                       |
| Index test interpreted independently of all clinical information | Explicitly mentioned in publication (+), not mentioned (?)                                                                                                                                                                      |
| Avoidance of treatment paradox                                   | [part 1] Measurement of reference standard before any interventions were started, without knowledge of test results (+), not mentioned (?)<br>[part 2] Samples for reference standard taken on first day (+), not mentioned (?) |
| Criteria relevant to the applicability of the results            |                                                                                                                                                                                                                                 |
| Setting*                                                         | Enough information to identify setting (community through tertiary care) (+), not enough information (-)                                                                                                                        |
| Duration of illness                                              | Duration mentioned (+), not mentioned (-)                                                                                                                                                                                       |
| Demographic information                                          | Average or median age mentioned (+), not mentioned (-)                                                                                                                                                                          |

A plus, minus, or question mark were adjudged if criteria were present, absent, or not mentioned.

\*Essential criteria defined by Lijmer et al.<sup>23</sup>

Posted as supplied by author.

**Table B** performance of C-reactive protein in the detection of radiologically proven pneumonia (part 1) or bacterial aetiology of lower respiratory tract infection (part 2)

| Author                                                       | Cut-off CRP | n≤ cut-off CRP | n>cut-off CRP | Prevalence | Sensitivity (95% CI) | Specificity (95% CI) | LR + (95% CI)       | LR – (95% CI)       |
|--------------------------------------------------------------|-------------|----------------|---------------|------------|----------------------|----------------------|---------------------|---------------------|
| Part 1; detection of infiltrate                              |             |                |               |            |                      |                      |                     |                     |
| Flanders et al.[17]                                          | 11          | 84             | 84            | 12%        | 0.85 (0.64 to 0.95)  | 0.55 (0.47 to 0.63)  | 1.88 (1.45 to 2.42) | 0.27 (0.10 to 0.79) |
|                                                              | 40          | 139            | 29            |            | 0.70 (0.48 to 0.86)  | 0.90 (0.84 to 0.94)  | 6.91 (3.95 to 12.1) | 0.33 (0.17 to 0.65) |
|                                                              | 100         | 160            | 8             |            | 0.35 (0.18 to 0.57)  | 0.99 (0.96 to 1.00)  | 51.8 (9.72 to 399)  | 0.65 (0.47 to 0.90) |
| Almirall et al.[34]                                          | 33          | 41             | 175           | 93%        | 0.83 (0.77 to 0.88)  | 0.44 (0.27 to 0.63)  | 1.48 (1.04 to 2.11) | 0.38 (0.22 to 0.68) |
|                                                              | 50          | 59             | 157           |            | 0.76 (0.69 to 0.81)  | 0.63 (0.39 to 0.82)  | 2.01 (1.06 to 3.81) | 0.39 (0.25 to 0.62) |
|                                                              | 100         | 102            | 114           |            | 0.55 (0.48 to 0.62)  | 0.75 (0.51 to 0.90)  | 2.20 (0.93 to 5.19) | 0.60 (0.44 to 0.83) |
| Hopstaken et al.[37]                                         | 20          | 110            | 133           | 13%        | 0.91 (0.76 to 0.97)  | 0.51 (0.44 to 0.57)  | 1.84 (1.54 to 2.19) | 0.19 (0.06 to 0.55) |
|                                                              | 50          | 163            | 80            |            | 0.88 (0.72 to 0.95)  | 0.75 (0.69 to 0.81)  | 3.55 (2.71 to 4.65) | 0.16 (0.07 to 0.42) |
|                                                              | 100         | 197            | 46            |            | 0.69 (0.51 to 0.82)  | 0.89 (0.84 to 0.92)  | 6.04 (3.88 to 9.42) | 0.35 (0.21 to 0.59) |
| Melbye et al. ('92)[38]                                      | 20          | 277            | 125           | 5%         | 0.80 (0.58 to 0.92)  | 0.72 (0.67 to 0.76)  | 2.80 (2.14 to 3.68) | 0.28 (0.12 to 0.67) |
|                                                              | 50          | 352            | 50            |            | 0.50 (0.30 to 0.70)  | 0.90 (0.87 to 0.93)  | 5.03 (2.95 to 8.56) | 0.56 (0.36 to 0.86) |
|                                                              | 100         | 391            | 11            |            | 0.10 (0.03 to 0.30)  | 0.98 (0.96 to 0.99)  | 4.24 (0.98 to 18.4) | 0.92 (0.80 to 1.07) |
| Babu et al.[39]                                              | 20          | 27             | 33            | 50%        | 0.98 (0.86 to 1.00)  | 0.89 (0.73 to 0.96)  | 8.71 (3.25 to 23.4) | 0.02 (0.00 to 0.29) |
|                                                              | 35          | 30             | 30            |            | 0.98 (0.86 to 1.00)  | 0.98 (0.86 to 1.00)  | 61.0 (3.90 to 954)  | 0.02 (0.00 to 0.26) |
|                                                              | 100         | 33             | 27            |            | 0.89 (0.73 to 0.96)  | 0.98 (0.86 to 1.00)  | 55.0 (3.51 to 862)  | 0.12 (0.04 to 0.31) |
| Melbye et al ('88)[40]                                       | 11          | 36             | 32            | 16%        | 0.82 (0.52 to 0.95)  | 0.60 (0.47 to 0.71)  | 2.03 (1.33 to 3.09) | 0.31 (0.09 to 1.09) |
|                                                              | 50          | 58             | 10            |            | 0.73 (0.43 to 0.90)  | 0.97 (0.88 to 0.99)  | 20.7 (5.07 to 84.8) | 0.28 (0.12 to 0.74) |
| Part 2; discrimination between bacterial and viral aetiology |             |                |               |            |                      |                      |                     |                     |
| Almirall et al.[34]                                          | 50          | 15             | 68            | 71%        | 0.86 (0.76 to 0.93)  | 0.29 (0.15 to 0.49)  | 1.22 (0.93 to 1.61) | 0.47 (0.19 to 1.14) |
|                                                              | 100         | 27             | 56            |            | 0.76 (0.64 to 0.85)  | 0.54 (0.35 to 0.72)  | 1.66 (1.05 to 2.63) | 0.44 (0.24 to 0.79) |
|                                                              | 120         | 34             | 49            |            | 0.71 (0.59 to 0.81)  | 0.71 (0.51 to 0.85)  | 2.44 (1.28 to 4.65) | 0.41 (0.25 to 0.66) |

|                           |                                       |     |     |     |                     |                     |                     |                     |
|---------------------------|---------------------------------------|-----|-----|-----|---------------------|---------------------|---------------------|---------------------|
| Prat et al.[41]           | 20                                    | 14  | 62  | 63% | 0.88 (0.75 to 0.94) | 0.29 (0.15 to 0.47) | 1.23 (0.95 to 1.59) | 0.44 (0.17 to 1.13) |
|                           | 60                                    | 28  | 48  |     | 0.81 (0.68 to 0.90) | 0.68 (0.49 to 0.82) | 2.53 (1.45 to 4.40) | 0.28 (0.15 to 0.53) |
|                           | 100                                   | 29  | 37  |     | 0.63 (0.48 to 0.75) | 0.61 (0.39 to 0.80) | 1.61 (0.87 to 2.99) | 0.61 (0.37 to 1.03) |
| Requejo et al.[42]        | +/-                                   | 183 | 72  | 17% | 0.99 (0.90 to 1.00) | 0.87 (0.82 to 0.91) | 7.70 (5.46 to 10.9) | 0.01 (0.00 to 0.20) |
| Garcia Vazquez et al.[43] | No usable quantitative data available |     |     |     |                     |                     |                     |                     |
| Virkki et al.[36]         | 40                                    | 88  | 127 | 62% | 0.66 (0.58 to 0.74) | 0.53 (0.42 to 0.64) | 1.42 (1.09 to 1.84) | 0.63 (0.46 to 0.86) |
|                           | 80                                    | 122 | 93  |     | 0.52 (0.44 to 0.61) | 0.72 (0.61 to 0.80) | 1.84 (1.26 to 2.70) | 0.67 (0.53 to 0.83) |
|                           | 120                                   | 155 | 60  |     | 0.36 (0.28 to 0.44) | 0.85 (0.76 to 0.91) | 2.42 (1.37 to 4.27) | 0.75 (0.65 to 0.88) |
| Hedlund et al.[44]        | No usable quantitative data available |     |     |     |                     |                     |                     |                     |
| Heiskanen et al.[45]      | 20                                    | 69  | 61  | 77% | 0.46 (0.37 to 0.56) | 0.50 (0.33 to 0.67) | 0.92 (0.61 to 1.40) | 1.08 (0.72 to 1.61) |
|                           | 40                                    | 108 | 22  |     | 0.16 (0.10 to 0.24) | 0.80 (0.63 to 0.91) | 0.80 (0.34 to 1.86) | 1.05 (0.86 to 1.28) |
|                           | 60                                    | 119 | 11  |     | 0.08 (0.04 to 0.15) | 0.90 (0.74 to 0.97) | 0.80 (0.23 to 2.83) | 1.02 (0.90 to 1.17) |
| Nohynek et al.[46]        | 20                                    | 22  | 62  | 64% | 0.74 (0.61 to 0.84) | 0.27 (0.14 to 0.44) | 1.01 (0.77 to 1.32) | 0.97 (0.46 to 2.05) |
|                           | 40                                    | 51  | 33  |     | 0.41 (0.29 to 0.54) | 0.63 (0.46 to 0.78) | 1.11 (0.63 to 1.96) | 0.94 (0.66 to 1.33) |
|                           | 80                                    | 68  | 16  |     | 0.24 (0.15 to 0.37) | 0.90 (0.74 to 0.97) | 2.41 (0.75 to 7.78) | 0.84 (0.70 to 1.02) |
| Ortqvist et al.[47]       | No usable quantitative data available |     |     |     |                     |                     |                     |                     |
| Korppi et al. ('92)[48]   | 20                                    | 117 | 92  | 53% | 0.52 (0.43 to 0.61) | 0.65 (0.55 to 0.73) | 1.47 (1.06 to 2.02) | 0.75 (0.59 to 0.95) |
|                           | 40                                    | 158 | 51  |     | 0.36 (0.27 to 0.45) | 0.88 (0.80 to 0.93) | 2.93 (1.63 to 5.26) | 0.73 (0.63 to 0.86) |
|                           | 80                                    | 188 | 21  |     | 0.15 (0.09 to 0.22) | 0.95 (0.89 to 0.98) | 2.88 (1.10 to 7.57) | 0.90 (0.82 to 0.98) |
| Kerttula et al.[49]       | 80                                    | 13  | 46  | 92% | 0.85 (0.73 to 0.92) | 0.91 (0.52 to 0.99) | 10.2 (0.71 to 145)  | 0.17 (0.09 to 0.33) |
| McCarthy et al.[50]       | No usable quantitative data available |     |     |     |                     |                     |                     |                     |
